# Supplementary material for: Methanogenic Archaea in the Pediatric Inflammatory Bowel Disease in Relation to Disease Type and Activity
Source: MDPI journal article supplement (doi:10.3390/ijms25010673), 2024-01-04
Supplement: s1 [file s1]

**Table S1.** Detailed diagnoses of the patients from the control group.

| <b>Diagnosis</b>                                                                   | <b>No. of patients</b> |
|------------------------------------------------------------------------------------|------------------------|
| Hirschsprung's disease                                                             | 1                      |
| Functional intestinal disorders, unspecified                                       | 2                      |
| Feeding difficulties and incorrect feeding                                         | 1                      |
| Gastroesophageal reflux with esophagitis                                           | 1                      |
| Gastroesophageal reflux                                                            | 2                      |
| Pain in the abdominal and pelvic area                                              | 1                      |
| Streptococcal pharyngitis                                                          | 1                      |
| Unspecified arthritis                                                              | 1                      |
| Pain located in the lower abdomen                                                  | 1                      |
| Fructose metabolism disorders                                                      | 2                      |
| Other laryngeal diseases                                                           | 1                      |
| Different and unspecified abdominal pain                                           | 1                      |
| Paralytic syndrome, unspecified                                                    | 1                      |
| Other specified metabolic disorders                                                | 1                      |
| Chronic mucous otitis media                                                        | 1                      |
| Different and unspecified abdominal pain                                           | 1                      |
| Other signs and symptoms affecting the gastrointestinal tract and abdominal cavity | 1                      |
| Other ear disorders in diseases classified elsewhere                               | 1                      |
| Embolism and thrombosis of the arteries of the lower limbs                         | 1                      |
| Esophageal varices without bleeding                                                | 1                      |
| Addisonian crisis                                                                  | 1                      |
| Other specific diseases of the digestive system                                    | 1                      |
| Dwarfism                                                                           | 1                      |
| Food allergies                                                                     | 1                      |
